# Supplementary material for: Care pathways and factors associated with interhospital transfer to neurotrauma centers for patients with isolated moderate-to-severe traumatic brain injury: a population-based study from the Norwegian trauma registry
Source: PubMed Central journal article supplement (PMC10294301; doi:10.1186/s13049-023-01097-7), 2023-06-26
Supplement: 13049_2023_1097_MOESM1_ESM.pdf [file 13049_2023_1097_MOESM1_ESM.pdf]

## Supplemental Online Content

*To Care pathways and factors associated with interhospital transfer to neurotrauma centers for patients with isolated moderate-to-severe traumatic brain injury: a population-based study from the Norwegian Trauma Registry*

List of contents:

- Suppl. Table 1: Variables extracted from the NTR.
- Suppl. Table 2: Categorization of AIS Head codes by pathoanatomic injury types.
- Suppl. Table 3: Road distances between ACTHs and corresponding NTCs.
- Suppl. Table 4: Transfer criteria (The Norwegian Trauma Plan)
  
- Suppl. Figure 1: Norwegian trauma field triage guidelines.
- Suppl. Figure 2: Overview of population density and neurotrauma centers and acute care trauma hospitals in Norway.
- Suppl. Figure 3: Age-stratified New Injury Severity Score (NISS) distributions for transferred and nontransferred patients.
- Suppl. Figure 4: Transfer probability by age and ASA-PS.
- Suppl. Figure 5: Transfer probability by age, NISS, and ASA-PS 3-4.

**Suppl. Table 1:** Variables extracted from the Norwegian Trauma Registry with details regarding operationalizing.

| <b>Variable name</b>                     | <b>NTR categories</b>                                               | <b>Category operationalization</b> |
|------------------------------------------|---------------------------------------------------------------------|------------------------------------|
| <b>Age</b>                               | continuous                                                          | N/A                                |
| <b>Sex</b>                               | Male                                                                | N/A                                |
|                                          | Female                                                              | N/A                                |
| <b>Preinjury ASA-PS</b>                  | 1-4 (no patients with >4)                                           | Full and dichotomized (1+2, 3+4)   |
| <b>Injury site municipality number</b>   | N/A                                                                 | N/A                                |
| <b>Mechanism of injury</b>               | 1 = Traffic: motor vehicle injury                                   | 1-5: Transport-related             |
|                                          | 2 = Traffic: motorcycle injury                                      | 9: Low-energy fall                 |
|                                          | 3 = Traffic: bicycle injury                                         | 10: High-energy fall               |
|                                          | 4 = Traffic: pedestrian                                             | 6, 7, 8, 11, 99: Other             |
|                                          | 5 = Traffic: other                                                  | 999 and missing: Missing           |
|                                          | 6 = Shot by handgun, shotgun, rifle, other firearm of any dimension |                                    |
|                                          | 7 = Stabbed by knife, sword, dagger, other pointed or sharp object  |                                    |
|                                          | 8 = Struck or hit by blunt object                                   |                                    |
|                                          | 9 = Low-energy fall                                                 |                                    |
|                                          | 10 = High-energy fall                                               |                                    |
|                                          | 11 = Blast injuries                                                 |                                    |
|                                          | 99 = Other                                                          |                                    |
|                                          | 999 = Unknown                                                       |                                    |
| <b>Emergency Department GCS</b>          | 3-15                                                                | N/A                                |
| <b>Highest level of in-hospital care</b> | 1 = Emergency Department                                            | 2 = General Ward (no change)       |
|                                          | 2 = General Ward                                                    | 4 and 5 = CCU/HDU                  |
|                                          | 3 = Operation Theatre                                               | 1, 3, 6 = Other                    |
|                                          | 4 = High Dependency Unit (HDU)                                      |                                    |
|                                          | 5 = Critical Care Unit (CDU)                                        |                                    |
|                                          | 6 = Unknown                                                         |                                    |
| <b>Abbreviated Injury Scale</b>          | N/A                                                                 | N/A                                |
| <b>New Injury Severity Score</b>         | N/A                                                                 | N/A                                |
| <b>30-day mortality</b>                  | N/A                                                                 | N/A                                |

Abbreviations: ASA-PS, American Society of Anesthesiologists physical status; GCS, Glasgow Coma Scale; N/A, Not applicable.

**Suppl. Table 2:** Categorization of Abbreviated Injury Scale Head codes to pathoanatomic injury types.

| <b>Pathoanatomic injury group</b>   | <b>Injury category according to AIS manual</b> | <b>Injury codes</b>                                | <b>Severity code</b> |
|-------------------------------------|------------------------------------------------|----------------------------------------------------|----------------------|
| <b>Skull fracture</b>               |                                                |                                                    |                      |
|                                     | Skull fractures NFS                            | 150000                                             | 2                    |
|                                     | Base (basilar) fractures                       | 1502xx                                             | .3-.4                |
|                                     | Vault fractures                                | 1504xx                                             | .2-.4                |
| <b>Vascular injuries</b>            |                                                |                                                    |                      |
|                                     | Arterial, sinus, and venous injuries           | 12xxxx                                             | .3-.6                |
| <b>Nerve injuries</b>               |                                                |                                                    |                      |
|                                     | Cranial nerve injuries                         | 13xxxx                                             | .2-.3                |
| <b>Epidural hematoma</b>            |                                                |                                                    |                      |
|                                     | Cerebellum epidural hematoma                   | 140414;<br>140416;<br>140418;<br>140422            | .2-.5                |
|                                     | Cerebrum epidural hematoma                     | 140630;<br>140631;<br>140632;<br>140634;<br>140636 | .2-.5                |
| <b>Subdural hematoma</b>            |                                                |                                                    |                      |
|                                     | Cerebellum subdural hematoma                   | 140438;<br>140440;<br>140442;<br>140446            | .2-.5                |
|                                     | Cerebral subdural hematoma                     | 14065x                                             | .3-.5                |
| <b>Traumatic SAH</b>                |                                                |                                                    |                      |
|                                     | Cerebellum tSAH                                | 140466                                             | 2                    |
|                                     | Cerebrum tSAH                                  | 140693;<br>140694;<br>140695                       | .2-.3                |
| <b>Other extra-axial hemorrhage</b> |                                                |                                                    |                      |
|                                     | Cerebellum hematoma NFS                        | 140410                                             | 3                    |
|                                     | Cerebrum hematoma NFS                          | 140629                                             | 3                    |
|                                     | Cerebellum subpial hemorrhage                  | 140470                                             | 2                    |
|                                     | Cerebrum subpial hemorrhage                    | 140696;<br>140697;<br>140698                       | .2-.3                |
| <b>Brain stem</b>                   |                                                |                                                    |                      |
|                                     | Brain stem NFS                                 | 140299                                             | 5                    |
|                                     | Brain stem compression, contusion, infarction  | 14020x                                             | 5                    |

|                        |                                                                                  |                                                                          |       |
|------------------------|----------------------------------------------------------------------------------|--------------------------------------------------------------------------|-------|
|                        | Brain stem hemorrhage, laceration, massive destruction, penetrating, transection | 14021x                                                                   | .5-.6 |
| <b>Brain contusion</b> |                                                                                  |                                                                          |       |
|                        | Cerebellum contusion                                                             | 14040x                                                                   | .2-.5 |
|                        | Cerebrum contusion                                                               | 14060x;<br>14061x;<br>140620;<br>140621;<br>140622;<br>140624;<br>140626 | .2-.5 |
|                        | Intracerebellar hematoma                                                         | 140426;<br>140428;<br>140430;<br>140434                                  | .2-.5 |
|                        | Intracerebral hematoma                                                           | 140638;<br>140639;<br>14064x                                             | .2-.5 |
| <b>DAI</b>             |                                                                                  |                                                                          |       |
|                        | Cerebrum                                                                         | 140628;<br>140625;<br>140627                                             | .4-.5 |
|                        | Concussive injuries; DAI                                                         | 161007;<br>161008;<br>161011;<br>161012;<br>161013                       | .4-.5 |
| <b>Penetrating</b>     |                                                                                  |                                                                          |       |
|                        | Penetrating injury to skull                                                      | 1160xx                                                                   | .3-.5 |
|                        | Cerebellum penetrating                                                           | 140478;<br>140477;<br>140476                                             | .3-.5 |
|                        | Cerebrum penetrating                                                             | 140690;<br>140691;<br>140692                                             | .3-.5 |
| <b>Other</b>           |                                                                                  |                                                                          |       |
|                        | Crush injury                                                                     | 113000                                                                   | 6     |
|                        | Cerebellum NFS                                                                   | 140499                                                                   | 3     |
|                        | Cerebellum laceration                                                            | 140474;<br>140473;<br>140472                                             | .3-.4 |
|                        | Cerebellum brain swelling/edema NFS                                              | 140450                                                                   | 3     |
|                        | Cerebellum infarction (due to traumatic vascular occlusion)                      | 140458                                                                   | 3     |
|                        | Cerebellum ischemic brain damage directly related to head trauma                 | 140462                                                                   | 3     |

|                                                                                                                                              |                                                                          |       |
|----------------------------------------------------------------------------------------------------------------------------------------------|--------------------------------------------------------------------------|-------|
| Cerebrum NFS                                                                                                                                 | 140699                                                                   | 3     |
| Cerebrum laceration                                                                                                                          | 140688;<br>140687;<br>140686                                             | .3-.4 |
| Cerebrum brain swelling NFS                                                                                                                  | 140660;<br>140662;<br>140664;<br>140666                                  | .3-.5 |
| Cerebrum brain edema NFS                                                                                                                     | 140668;<br>140670;<br>140672;<br>140674                                  | .3-.5 |
| Cerebrum infarction                                                                                                                          | 140676                                                                   | 3     |
| Cerebrum intraventricular hemorrhage                                                                                                         | 140678;<br>140675;<br>140677                                             | .2-.4 |
| Cerebrum ischemic brain damage<br>directly related to trauma                                                                                 | 140680;<br>140681;<br>140683                                             | .3-.5 |
| Pneumocephalus directly related to head<br>trauma                                                                                            | 140682                                                                   | 3     |
| Pituitary injury                                                                                                                             | 140799                                                                   | 3     |
| Concussive injuries                                                                                                                          | 161000;<br>161001;<br>161002;<br>161003;<br>161004;<br>161005;<br>161006 | .1-.3 |
| Scalp injuries                                                                                                                               | 110099;<br>110202;<br>11040x;<br>11060x;<br>11080x                       | .1-.3 |
| <b>.9-injuries not included</b>                                                                                                              |                                                                          |       |
| Injuries to the head NFS                                                                                                                     | 100099                                                                   | 9     |
| Died of head injury without further<br>substantiation of injuries or no autopsy<br>confirmation of specific injuries                         | 100999                                                                   | 9     |
| Trauma-associated findings not related<br>either to intervention or to anatomically-<br>described head injury NFS                            | 140689                                                                   | 9     |
| Cerebrum hypoxic or ischemic brain<br>damage secondary to systemic<br>hypoxemia, hypotension or shock not<br>directly related to head trauma | 14070x                                                                   | 9     |

Based on AIS 2005, update 2008

Injury codes including x denote all numbers with that prefix. Severity codes given as ranges reflect all severity codes possible for that injury category.

NFS: Not Further Specified.

**Suppl. Table 3:** Overview of road distances and drive times between acute care trauma hospitals and corresponding neurotrauma centers in Norway.

| <b>Neurotrauma center (NTC)</b> | <b>Acute care trauma hospital</b> | <b>Distance to regional NTC (km)*</b> | <b>Drive time (hh:mm)*</b> |
|---------------------------------|-----------------------------------|---------------------------------------|----------------------------|
| Haukeland University Hospital   | Førde                             | 179                                   | 03:16                      |
| Haukeland University Hospital   | Haugesund                         | 139                                   | 03:13                      |
| Haukeland University Hospital   | Odda                              | 136                                   | 02:41                      |
| Haukeland University Hospital   | Stord                             | 84                                    | 02:25                      |
| Haukeland University Hospital   | Voss                              | 103                                   | 01:31                      |
| St. Olav University Hospital    | Kristiansund                      | 197                                   | 03:21                      |
| St. Olav University Hospital    | Levanger                          | 80                                    | 01:09                      |
| St. Olav University Hospital    | Molde                             | 220                                   | 03:40                      |
| St. Olav University Hospital    | Namsos                            | 195                                   | 02:52                      |
| St. Olav University Hospital    | Volda                             | 347                                   | 06:39                      |
| St. Olav University Hospital    | Ålesund                           | 290                                   | 05:26                      |
| Stavanger University Hospital   | N/A                               | N/A                                   | N/A                        |
| UNN Tromsø                      | Bodø                              | 538                                   | 07:51                      |
| UNN Tromsø                      | Hammerfest                        | 439                                   | 08:46                      |
| UNN Tromsø                      | Harstad                           | 303                                   | 04:09                      |
| UNN Tromsø                      | Kirkenes                          | 809                                   | 10:43                      |
| UNN Tromsø                      | Lofoten                           | 497                                   | 06:43                      |
| UNN Tromsø                      | Mo i Rana                         | 658                                   | 09:11                      |
| UNN Tromsø                      | Narvik                            | 235                                   | 03:15                      |
| UNN Tromsø                      | Sandnessjøen                      | 767                                   | 10:49                      |
| UNN Tromsø                      | Vesterålen                        | 409                                   | 05:34                      |
| Ullevål University Hospital     | Ahus                              | 18                                    | 00:22                      |
| Ullevål University Hospital     | Arendal                           | 258                                   | 02:59                      |
| Ullevål University Hospital     | Bærum                             | 16                                    | 00:21                      |
| Ullevål University Hospital     | Drammen                           | 43                                    | 00:43                      |
| Ullevål University Hospital     | Flekkefjord                       | 426                                   | 05:11                      |
| Ullevål University Hospital     | Fredrikstad, Kalnes               | 90                                    | 01:09                      |
| Ullevål University Hospital     | Gjøvik                            | 123                                   | 01:54                      |
| Ullevål University Hospital     | Hamar                             | 129                                   | 01:28                      |
| Ullevål University Hospital     | Kongsvinger                       | 94                                    | 01:20                      |
| Ullevål University Hospital     | Kristiansand                      | 321                                   | 03:41                      |
| Ullevål University Hospital     | Lillehammer                       | 184                                   | 02:08                      |
| Ullevål University Hospital     | Ringerike                         | 55                                    | 01:00                      |
| Ullevål University Hospital     | Telemark, Skien                   | 135                                   | 02:03                      |
| Ullevål University Hospital     | Tynset                            | 326                                   | 04:04                      |
| Ullevål University Hospital     | Tønsberg                          | 103                                   | 01:19                      |

\*Distance and drive time estimates according to openstreetmap.org

Abbreviations: NTC, Neurotrauma center; UNN, University Hospital of Northern Norway.

**Suppl. Table 4:** Overview of selected transfer criteria for injuries to the head and CNS, according to the Norwegian Trauma Plan.

- Penetrating injury/open fracture
- Depressed fracture
- Lateralizing signs
- GCS deterioration
- GCS <14 with CT findings
- Spinal injury or unstable spinal/neck fracture

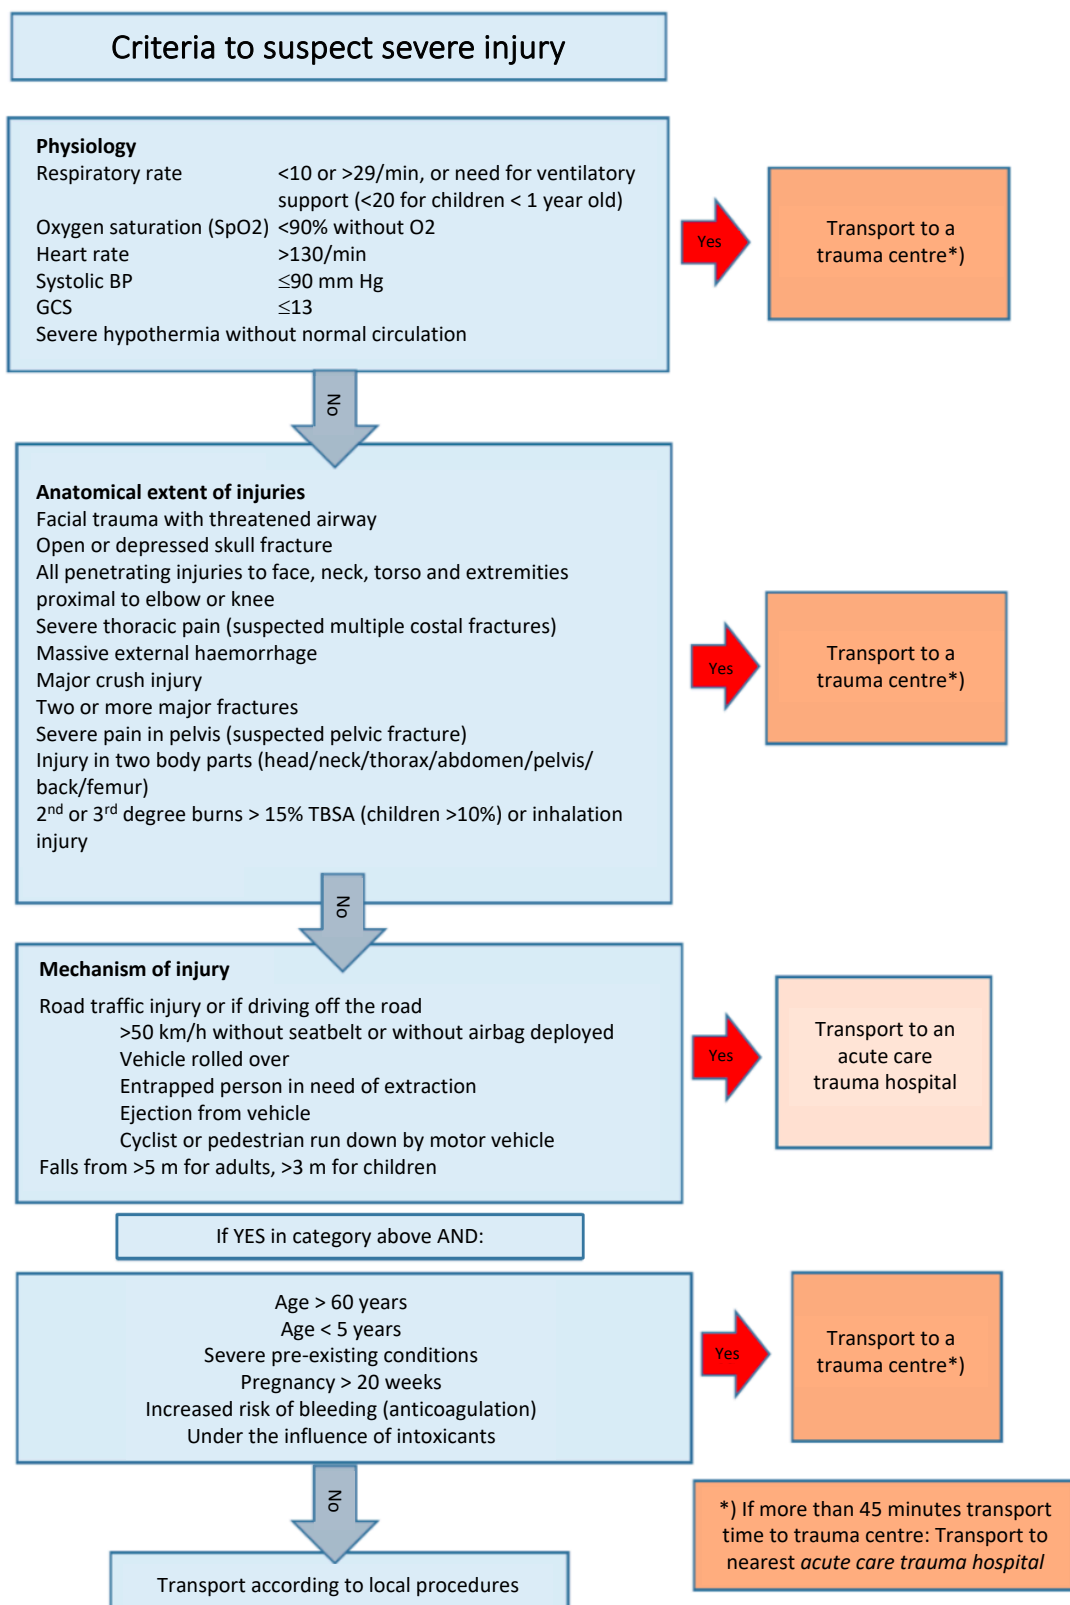

**Suppl. Figure 1: The Norwegian trauma field triage criteria.**



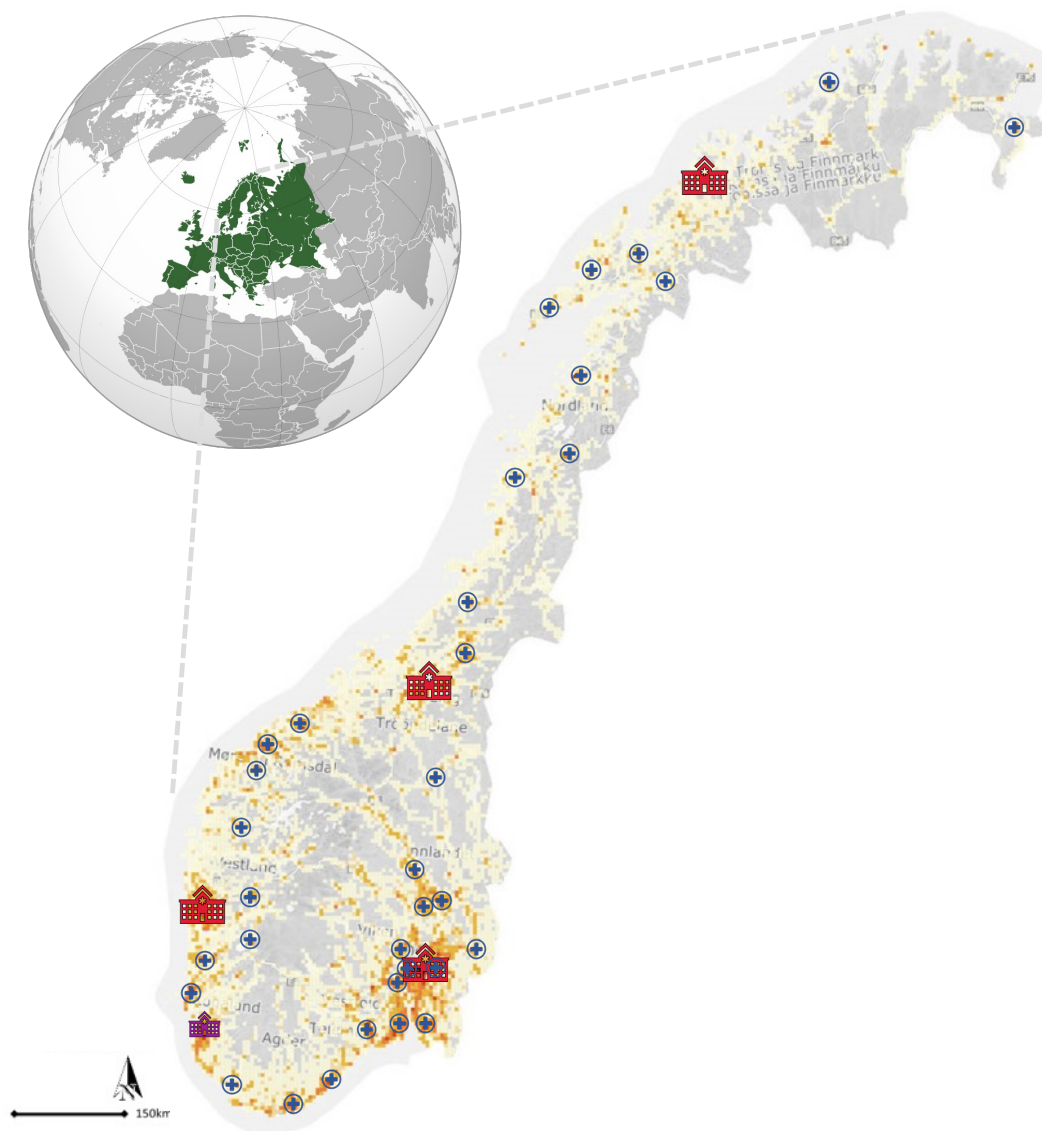

**Suppl. Figure 2: Overview of population density and neurotrauma centers and acute care trauma hospitals in Norway.**

A population density map of Norway with locations of neurotrauma centers (red for regional trauma centers and violet for the one acute care trauma hospital with neurotrauma services) and acute care trauma hospitals (blue) superimposed. Colors from light yellow to orange represent increasing population density. Left: Norway's location in Europe. *Public domain content from Wikimedia Commons and Statistics Norway.*

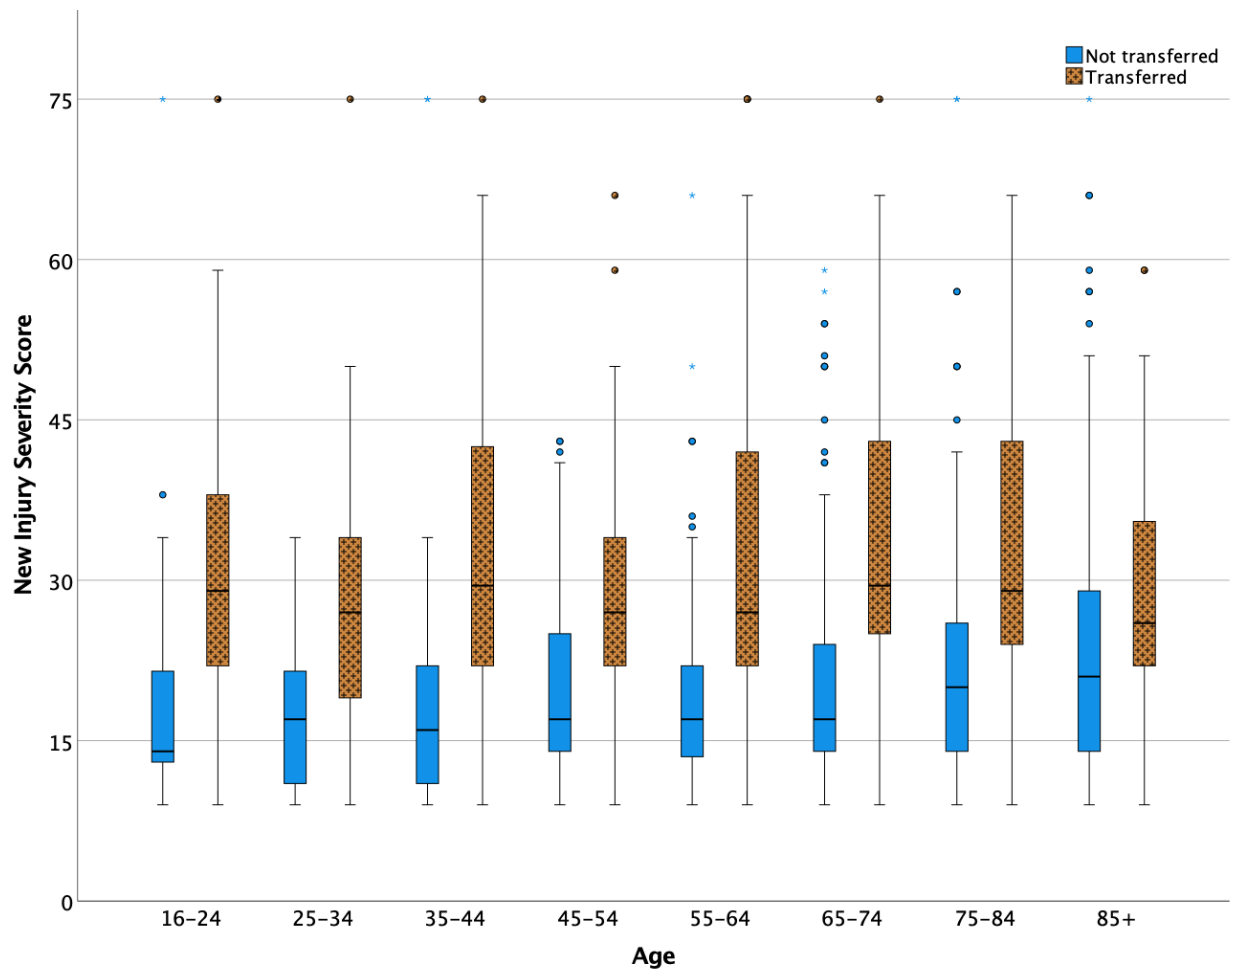

**Suppl. Figure 3: Age-stratified New Injury Severity Score (NISS) distributions for transferred and nontransferred patients.**

New Injury Severity Score (NISS) distributions for patients with isolated moderate-to-severe traumatic brain injury primarily admitted to acute care trauma hospitals, comparing nontransferred to transferred patients within age groups. The lower NISS range at 9 reflects the study inclusion criteria. Circles symbolize outliers and asterisks extreme outliers.

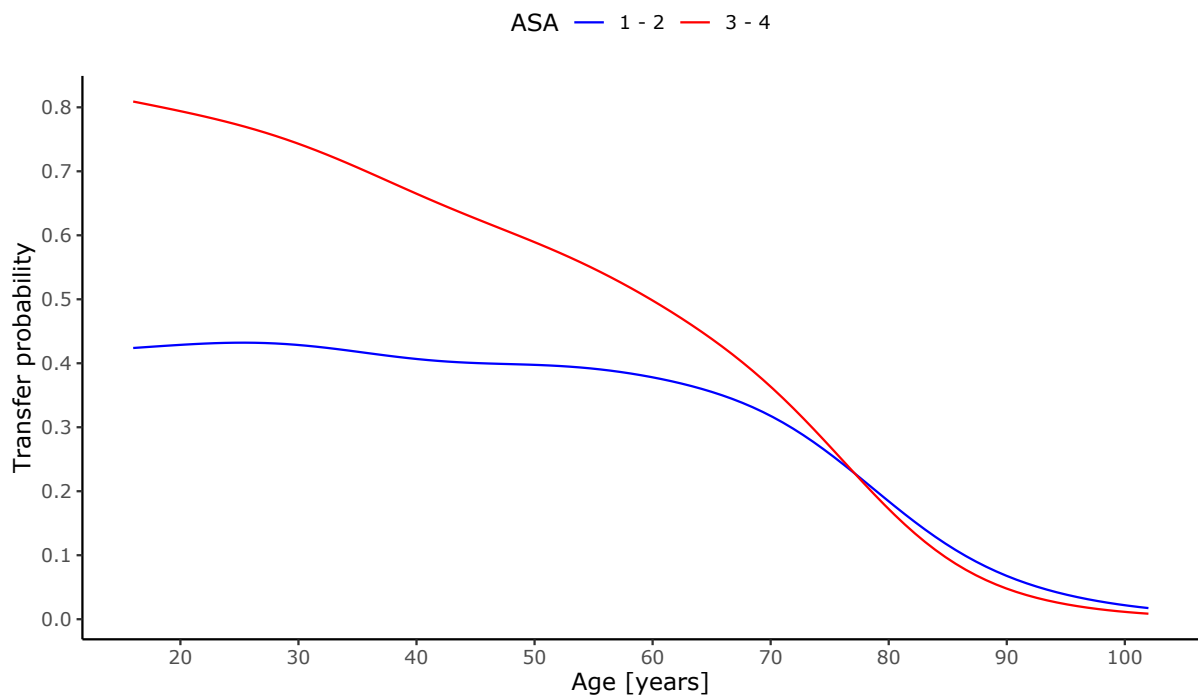

**Suppl. Figure 4: Transfer probability by age and preinjury ASA-PS.**

The probability of interhospital transfer for patients with isolated moderate-to-severe traumatic brain injury, comparing patients with preinjury American Society of Anesthesiologists physical status scores (ASA-PS) 1-2 with 3-4.

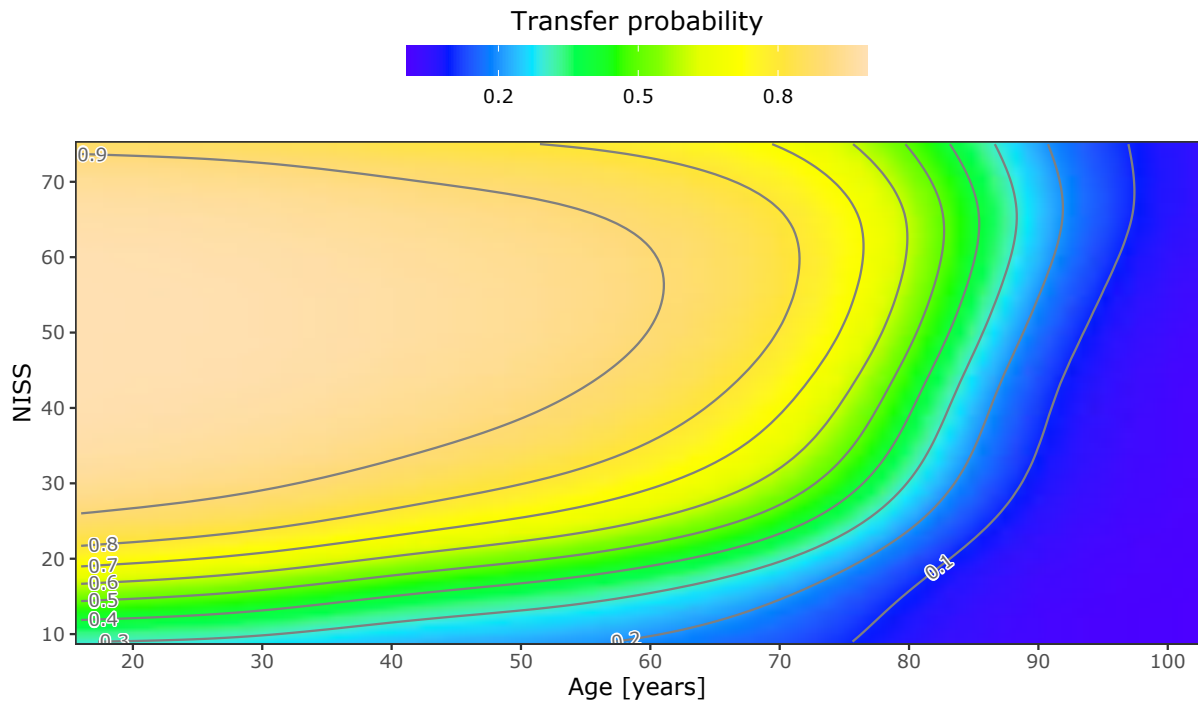

**Suppl. Figure 5: Transfer probability by age, NISS, and preinjury ASA-PS 3-4.**

Contour plot showing the estimated probability for interhospital transfer as NISS and patient age changes for patients with preinjury comorbidity according to the American Society of Anesthesiologists physical status score (ASA-PS) 3-4, as a function of the full generalized additive model. Other covariates are fixed at their median and mode values for continuous and categorical data, respectively. For comparison with ASA-PS 1-2 patients, see figure 5A.
